# Supplementary material for: Single-cell RNA-sequencing reveals pre-meiotic X-chromosome dosage compensation in Drosophila testis
Source: PubMed Central journal article supplement (PMC8396764; doi:10.1371/journal.pgen.1009728), 2021-08-17

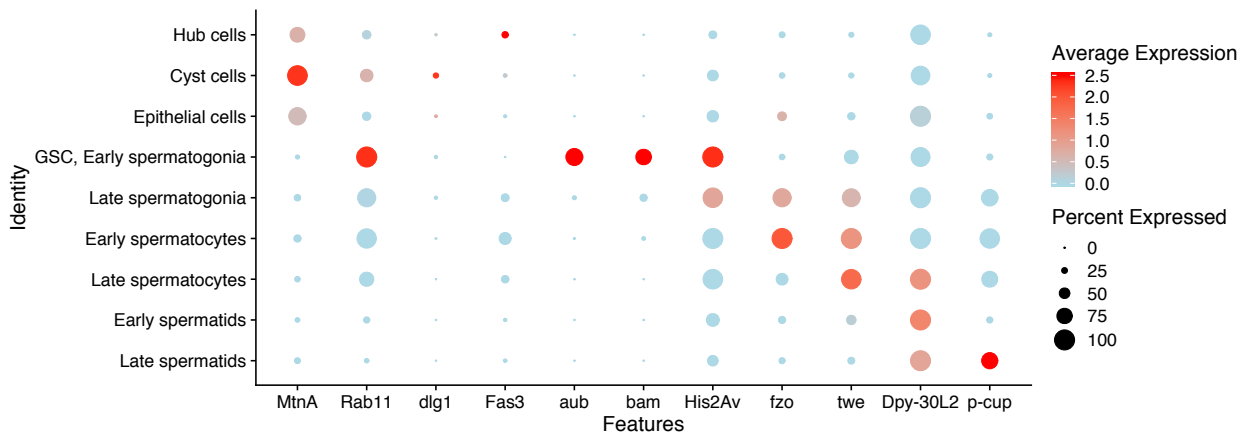

Supplement: pgen.1009728.s002.pdf [file pgen.1009728.s002.pdf]
